# Supplementary material
Source: MDPI journal article supplement (https://www.mdpi.com/2304-6740/7/9/115)

# checkCIF/PLATON report

Structure factors have been supplied for datablock(s) alet\_0m\_a

THIS REPORT IS FOR GUIDANCE ONLY. IF USED AS PART OF A REVIEW PROCEDURE FOR PUBLICATION, IT SHOULD NOT REPLACE THE EXPERTISE OF AN EXPERIENCED CRYSTALLOGRAPHIC REFEREE.

No syntax errors found.      CIF dictionary      Interpreting this report

## Datablock: alet\_0m\_a

---

Bond precision:    C-C = 0.0042 Å

Wavelength=1.54178

Cell:                    a=12.7424(6)            b=7.3373(3)            c=15.3561(7)  
                          alpha=90            beta=114.107(1)        gamma=90  
Temperature:            143 K

|                | Calculated         | Reported                        |
|----------------|--------------------|---------------------------------|
| Volume         | 1310.50(10)        | 1310.50(10)                     |
| Space group    | P 21/c             | P 1 21/c 1                      |
| Hall group     | -P 2ybc            | -P 2ybc                         |
| Moiety formula | C9 H18 Cl In N2 S2 | 0.33(C9 H18 Cl In N2 S2)        |
| Sum formula    | C9 H18 Cl In N2 S2 | C3 H6 Cl0.33 In0.33 N0.67 S0.67 |
| Mr             | 368.64             | 122.88                          |
| Dx,g cm-3      | 1.868              | 1.868                           |
| Z              | 4                  | 12                              |
| Mu (mm-1)      | 19.030             | 19.030                          |
| F000           | 736.0              | 736.0                           |
| F000'          | 741.78             |                                 |
| h,k,lmax       | 15,9,18            | 15,9,18                         |
| Nref           | 2589               | 2567                            |
| Tmin,Tmax      | 0.153,0.149        | 0.377,0.754                     |
| Tmin'          | 0.015              |                                 |

Correction method= # Reported T Limits: Tmin=0.377 Tmax=0.754

AbsCorr = NONE

Data completeness= 0.992

Theta(max)= 72.423

R(reflections)= 0.0275( 2556)

wR2(reflections)= 0.0720( 2567)

S = 1.198

Npar= 137

---

The following ALERTS were generated. Each ALERT has the format

**test-name\_ALERT\_alert-type\_alert-level.**

Click on the hyperlinks for more details of the test.

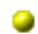

### Alert level C

ABSTY03\_ALERT\_1\_C The \_exptl\_absorpt\_correction\_type has been given as none.

However values have been given for Tmin and Tmax. Remove these if an absorption correction has not been applied.

From the CIF: \_exptl\_absorpt\_correction\_T\_min 0.377

From the CIF: \_exptl\_absorpt\_correction\_T\_max 0.754

|                                                                    |     |        |
|--------------------------------------------------------------------|-----|--------|
| PLAT250_ALERT_2_C Large U3/U1 Ratio for Average U(i,j) Tensor .... | 2.2 | Note   |
| PLAT911_ALERT_3_C Missing FCF Refl Between Thmin & STh/L= 0.600    | 18  | Report |
| PLAT913_ALERT_3_C Missing # of Very Strong Reflections in FCF .... | 4   | Note   |
| PLAT934_ALERT_3_C Number of (Iobs-Icalc)/SigmaW > 10 Outliers .... | 1   | Check  |

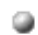

### Alert level G

FORMU01\_ALERT\_1\_G There is a discrepancy between the atom counts in the \_chemical\_formula\_sum and \_chemical\_formula\_moiety. This is usually due to the moiety formula being in the wrong format.

Atom count from \_chemical\_formula\_sum: C3 H6 Cl0.33 In0.33 N0.67 S0.

Atom count from \_chemical\_formula\_moiety: C2.97 H5.94 Cl0.33 In0.33 N0.

CELLZ01\_ALERT\_1\_G Difference between formula and atom\_site contents detected.

CELLZ01\_ALERT\_1\_G ALERT: check formula stoichiometry or atom site occupancies.

From the CIF: \_cell\_formula\_units\_Z 12

From the CIF: \_chemical\_formula\_sum C3 H6 Cl0.33 In0.33 N0.67 S0.67

TEST: Compare cell contents of formula and atom\_site data

| atom | Z*formula | cif sites | diff  |
|------|-----------|-----------|-------|
| C    | 36.00     | 36.00     | 0.00  |
| H    | 72.00     | 72.00     | 0.00  |
| Cl   | 3.96      | 4.00      | -0.04 |
| In   | 3.96      | 4.00      | -0.04 |
| N    | 8.04      | 8.00      | 0.04  |
| S    | 8.04      | 8.00      | 0.04  |

|                                                                    |        |        |
|--------------------------------------------------------------------|--------|--------|
| PLAT042_ALERT_1_G Calc. and Reported MoietyFormula Strings Differ  | Please | Check  |
| PLAT045_ALERT_1_G Calculated and Reported Z Differ by a Factor ... | 0.33   | Check  |
| PLAT793_ALERT_4_G Model has Chirality at N1 (Centro SPGR)          | S      | Verify |
| PLAT793_ALERT_4_G Model has Chirality at N2 (Centro SPGR)          | R      | Verify |
| PLAT883_ALERT_1_G No Info/Value for _atom_sites_solution_primary . | Please | Do !   |
| PLAT912_ALERT_4_G Missing # of FCF Reflections Above STh/L= 0.600  | 4      | Note   |
| PLAT978_ALERT_2_G Number C-C Bonds with Positive Residual Density. | 3      | Info   |

0 **ALERT level A** = Most likely a serious problem - resolve or explain

0 **ALERT level B** = A potentially serious problem, consider carefully

5 **ALERT level C** = Check. Ensure it is not caused by an omission or oversight

10 **ALERT level G** = General information/check it is not something unexpected

7 **ALERT type 1** CIF construction/syntax error, inconsistent or missing data

2 **ALERT type 2** Indicator that the structure model may be wrong or deficient

3 **ALERT type 3** Indicator that the structure quality may be low

3 **ALERT type 4** Improvement, methodology, query or suggestion

0 **ALERT type 5** Informative message, check

It is advisable to attempt to resolve as many as possible of the alerts in all categories. Often the minor alerts point to easily fixed oversights, errors and omissions in your CIF or refinement strategy, so attention to these fine details can be worthwhile. In order to resolve some of the more serious problems it may be necessary to carry out additional measurements or structure refinements. However, the purpose of your study may justify the reported deviations and the more serious of these should normally be commented upon in the discussion or experimental section of a paper or in the "special\_details" fields of the CIF. checkCIF was carefully designed to identify outliers and unusual parameters, but every test has its limitations and alerts that are not important in a particular case may appear. Conversely, the absence of alerts does not guarantee there are no aspects of the results needing attention. It is up to the individual to critically assess their own results and, if necessary, seek expert advice.

### **Publication of your CIF in IUCr journals**

A basic structural check has been run on your CIF. These basic checks will be run on all CIFs submitted for publication in IUCr journals (*Acta Crystallographica*, *Journal of Applied Crystallography*, *Journal of Synchrotron Radiation*); however, if you intend to submit to *Acta Crystallographica Section C* or *E* or *IUCrData*, you should make sure that full publication checks are run on the final version of your CIF prior to submission.

### **Publication of your CIF in other journals**

Please refer to the *Notes for Authors* of the relevant journal for any special instructions relating to CIF submission.

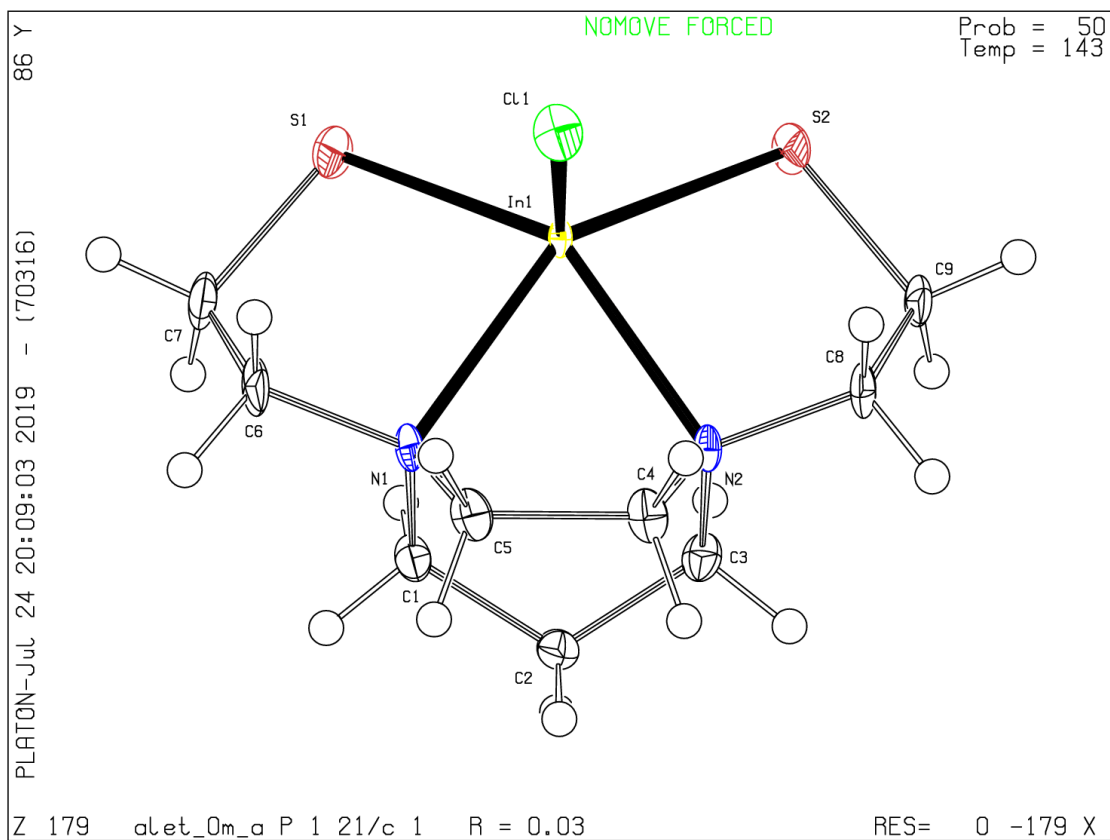

Supplement: s1 [file s1]
