# Supplementary material
Source: MDPI journal article supplement (https://www.mdpi.com/2304-6740/7/9/115)

# checkCIF/PLATON report

Structure factors have been supplied for datablock(s) mo\_AlMe\_0m

THIS REPORT IS FOR GUIDANCE ONLY. IF USED AS PART OF A REVIEW PROCEDURE FOR PUBLICATION, IT SHOULD NOT REPLACE THE EXPERTISE OF AN EXPERIENCED CRYSTALLOGRAPHIC REFEREE.

No syntax errors found.      CIF dictionary      Interpreting this report

## Datablock: mo\_AlMe\_0m

---

Bond precision:    C-C = 0.0082 A

Wavelength=0.71073

Cell:                a=7.354(4)                b=7.723(4)                c=12.601(6)  
                      alpha=94.767(7)        beta=98.204(7)        gamma=115.566(6)  
Temperature:        100 K

|                | Calculated       | Reported         |
|----------------|------------------|------------------|
| Volume         | 630.6(6)         | 630.6(5)         |
| Space group    | P -1             | P -1             |
| Hall group     | -P 1             | -P 1             |
| Moiety formula | C10 H20 Al N2 S2 | C10 H21 Al N2 S2 |
| Sum formula    | C10 H20 Al N2 S2 | C10 H21 Al N2 S2 |
| Mr             | 259.38           | 260.39           |
| Dx,g cm-3      | 1.366            | 1.371            |
| Z              | 2                | 2                |
| Mu (mm-1)      | 0.463            | 0.463            |
| F000           | 278.0            | 280.0            |
| F000'          | 278.67           |                  |
| h,k,lmax       | 8,9,15           | 8,9,15           |
| Nref           | 2346             | 2333             |
| Tmin,Tmax      | 0.989,0.991      |                  |
| Tmin'          | 0.977            |                  |

Correction method= # Reported T Limits: Tmin=\*\*\*\*\* Tmax=\*\*\*\*\*  
AbsCorr = MULTI-SCAN

Data completeness= 0.994

Theta(max)= 25.495

R(reflections)= 0.0733( 1437)

wR2(reflections)= 0.1386( 2333)

S = 1.250

Npar= 138

---

The following ALERTS were generated. Each ALERT has the format

**test-name\_ALERT\_alert-type\_alert-level.**

Click on the hyperlinks for more details of the test.

---

### Alert level C

ABSTY02\_ALERT\_1\_C An \_exptl\_absorpt\_correction\_type has been given without  
a literature citation. This should be contained in the  
\_exptl\_absorpt\_process\_details field.  
Absorption correction given as multi-scan

|                   |                                                  |              |
|-------------------|--------------------------------------------------|--------------|
| PLAT041_ALERT_1_C | Calc. and Reported SumFormula Strings Differ     | Please Check |
| PLAT043_ALERT_1_C | Calculated and Reported Mol. Weight Differ by .. | 1.01 Check   |
| PLAT068_ALERT_1_C | Reported F000 Differs from Calcd (or Missing)... | Please Check |
| PLAT234_ALERT_4_C | Large Hirshfeld Difference C1 -- C2 ..           | 0.16 Ang.    |
| PLAT250_ALERT_2_C | Large U3/U1 Ratio for Average U(i,j) Tensor .... | 2.5 Note     |
| PLAT340_ALERT_3_C | Low Bond Precision on C-C Bonds .....            | 0.0082 Ang.  |
| PLAT906_ALERT_3_C | Large K value in the Analysis of Variance .....  | 2.867 Check  |
| PLAT911_ALERT_3_C | Missing # FCF Refl Between THmin & STh/L= 0.600  | 13 Report    |
| PLAT978_ALERT_2_C | Number C-C Bonds with Positive Residual Density. | 0 Note       |

---

### Alert level G

FORMU01\_ALERT\_2\_G There is a discrepancy between the atom counts in the  
\_chemical\_formula\_sum and the formula from the \_atom\_site\* data.  
Atom count from \_chemical\_formula\_sum: C10 H21 Al1 N2 S2  
Atom count from the \_atom\_site data: C10 H20 Al1 N2 S2

CELLZ01\_ALERT\_1\_G Difference between formula and atom\_site contents detected.

CELLZ01\_ALERT\_1\_G WARNING: H atoms missing from atom site list. Is this intentional?  
From the CIF: \_cell\_formula\_units\_Z 2  
From the CIF: \_chemical\_formula\_sum C10 H21 Al1 N2 S2  
TEST: Compare cell contents of formula and atom\_site data

| atom | Z*formula | cif sites | diff |
|------|-----------|-----------|------|
| C    | 20.00     | 20.00     | 0.00 |
| H    | 42.00     | 40.00     | 2.00 |
| Al   | 2.00      | 2.00      | 0.00 |
| N    | 4.00      | 4.00      | 0.00 |
| S    | 4.00      | 4.00      | 0.00 |

|                   |                                                  |              |
|-------------------|--------------------------------------------------|--------------|
| PLAT042_ALERT_1_G | Calc. and Reported MoietyFormula Strings Differ  | Please Check |
| PLAT793_ALERT_4_G | The Model has Chirality at N1 (Centro SPGR)      | S Verify     |
| PLAT793_ALERT_4_G | The Model has Chirality at N2 (Centro SPGR)      | R Verify     |
| PLAT933_ALERT_2_G | Number of OMIT Records in Embedded .res File ... | 7 Note       |

---

- 0 **ALERT level A** = Most likely a serious problem - resolve or explain  
0 **ALERT level B** = A potentially serious problem, consider carefully  
10 **ALERT level C** = Check. Ensure it is not caused by an omission or oversight  
7 **ALERT level G** = General information/check it is not something unexpected
- 7 ALERT type 1 CIF construction/syntax error, inconsistent or missing data  
4 ALERT type 2 Indicator that the structure model may be wrong or deficient  
3 ALERT type 3 Indicator that the structure quality may be low  
3 ALERT type 4 Improvement, methodology, query or suggestion  
0 ALERT type 5 Informative message, check
- 

## Validation response form

Please find below a validation response form (VRF) that can be filled in and pasted into your CIF.

```
# start Validation Reply Form
_vrf_ABSTY02_mo_AlMe_0m
;
PROBLEM: An _exptl_absorpt_correction_type has been given without
RESPONSE: ...
;
```

```

_vrf_PLAT041_mo_AlMe_0m
;
PROBLEM: Calc. and Reported SumFormula      Strings Differ      Please Check
RESPONSE: ...
;
_vrf_PLAT043_mo_AlMe_0m
;
PROBLEM: Calculated and Reported Mol. Weight Differ by ..      1.01 Check
RESPONSE: ...
;
_vrf_PLAT068_mo_AlMe_0m
;
PROBLEM: Reported F000 Differs from Calcd (or Missing)...      Please Check
RESPONSE: ...
;
_vrf_PLAT234_mo_AlMe_0m
;
PROBLEM: Large Hirshfeld Difference C1      -- C2      ..      0.16 Ang.
RESPONSE: ...
;
_vrf_PLAT250_mo_AlMe_0m
;
PROBLEM: Large U3/U1 Ratio for Average U(i,j) Tensor ....      2.5 Note
RESPONSE: ...
;
_vrf_PLAT340_mo_AlMe_0m
;
PROBLEM: Low Bond Precision on C-C Bonds .....      0.0082 Ang.
RESPONSE: ...
;
_vrf_PLAT906_mo_AlMe_0m
;
PROBLEM: Large K value in the Analysis of Variance .....      2.867 Check
RESPONSE: ...
;
_vrf_PLAT911_mo_AlMe_0m
;
PROBLEM: Missing # FCF Refl Between THmin & STh/L= 0.600      13 Report
RESPONSE: ...
;
_vrf_PLAT978_mo_AlMe_0m
;
PROBLEM: Number C-C Bonds with Positive Residual Density.      0 Note
RESPONSE: ...
;
# end Validation Reply Form

```

---

It is advisable to attempt to resolve as many as possible of the alerts in all categories. Often the minor alerts point to easily fixed oversights, errors and omissions in your CIF or refinement strategy, so attention to these fine details can be worthwhile. In order to resolve some of the more serious problems it may be necessary to carry out additional measurements or structure refinements. However, the purpose of your study may justify the reported deviations and the more serious of these should normally be commented upon in the discussion or experimental section of a paper or in the "special\_details" fields of the CIF. checkCIF was carefully designed to identify outliers and unusual parameters, but every test has its limitations and alerts that are not important in a particular case may appear. Conversely, the absence of alerts does not guarantee there are no aspects of the results needing attention. It is up to the individual to critically assess their own results and, if necessary, seek expert advice.

### **Publication of your CIF in IUCr journals**

A basic structural check has been run on your CIF. These basic checks will be run on all CIFs submitted for publication in IUCr journals (*Acta Crystallographica*, *Journal of Applied Crystallography*, *Journal of Synchrotron Radiation*); however, if you intend to submit to *Acta Crystallographica Section C* or *E* or *IUCrData*, you should make sure that full publication checks are run on the final version of your CIF prior to submission.

### **Publication of your CIF in other journals**

Please refer to the *Notes for Authors* of the relevant journal for any special instructions relating to CIF submission.

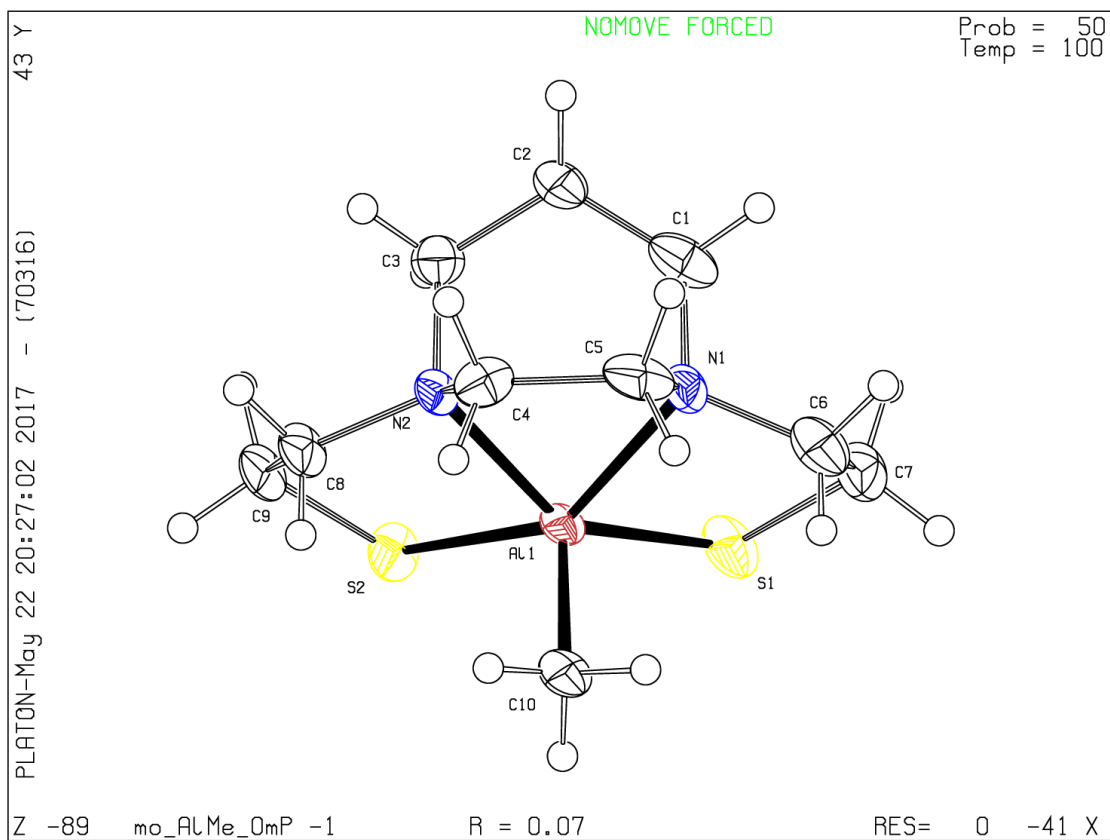

Supplement: s1 [file s1]
