# Supplementary material
Source: MDPI journal article supplement (https://www.mdpi.com/2304-6740/7/9/115)
Supplement: s1 [file s1]

# Supplementary Materials: Connecting Main-Group Metals (Al, Ga, In) and Tungsten(0) Carbonyls via the N<sub>2</sub>S<sub>2</sub> Metallo-Ligand Strategy

Xuemei Yang, Allen Lunsford and Marcetta Y. Darensbourg \*

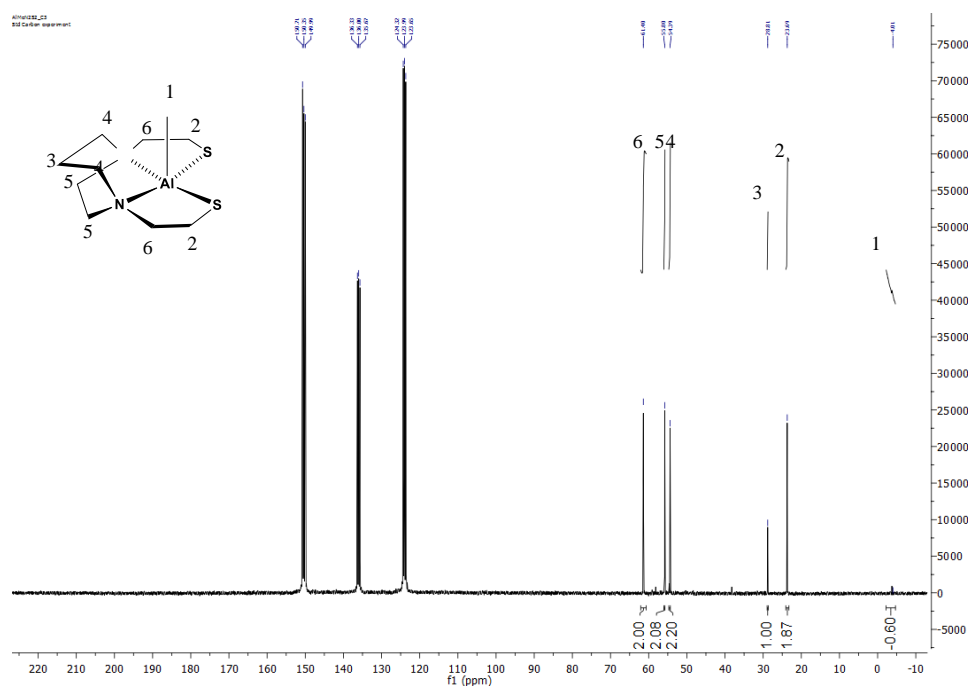

**Figure S1.** <sup>1</sup>H-NMR (up) and <sup>13</sup>C-NMR Spectrum of MeAlN<sub>2</sub>S<sub>2</sub> complex in pyridine-d<sub>5</sub> at 23.2 °C using a 300 MHz NMR spectrometer referenced to residual pyridine.

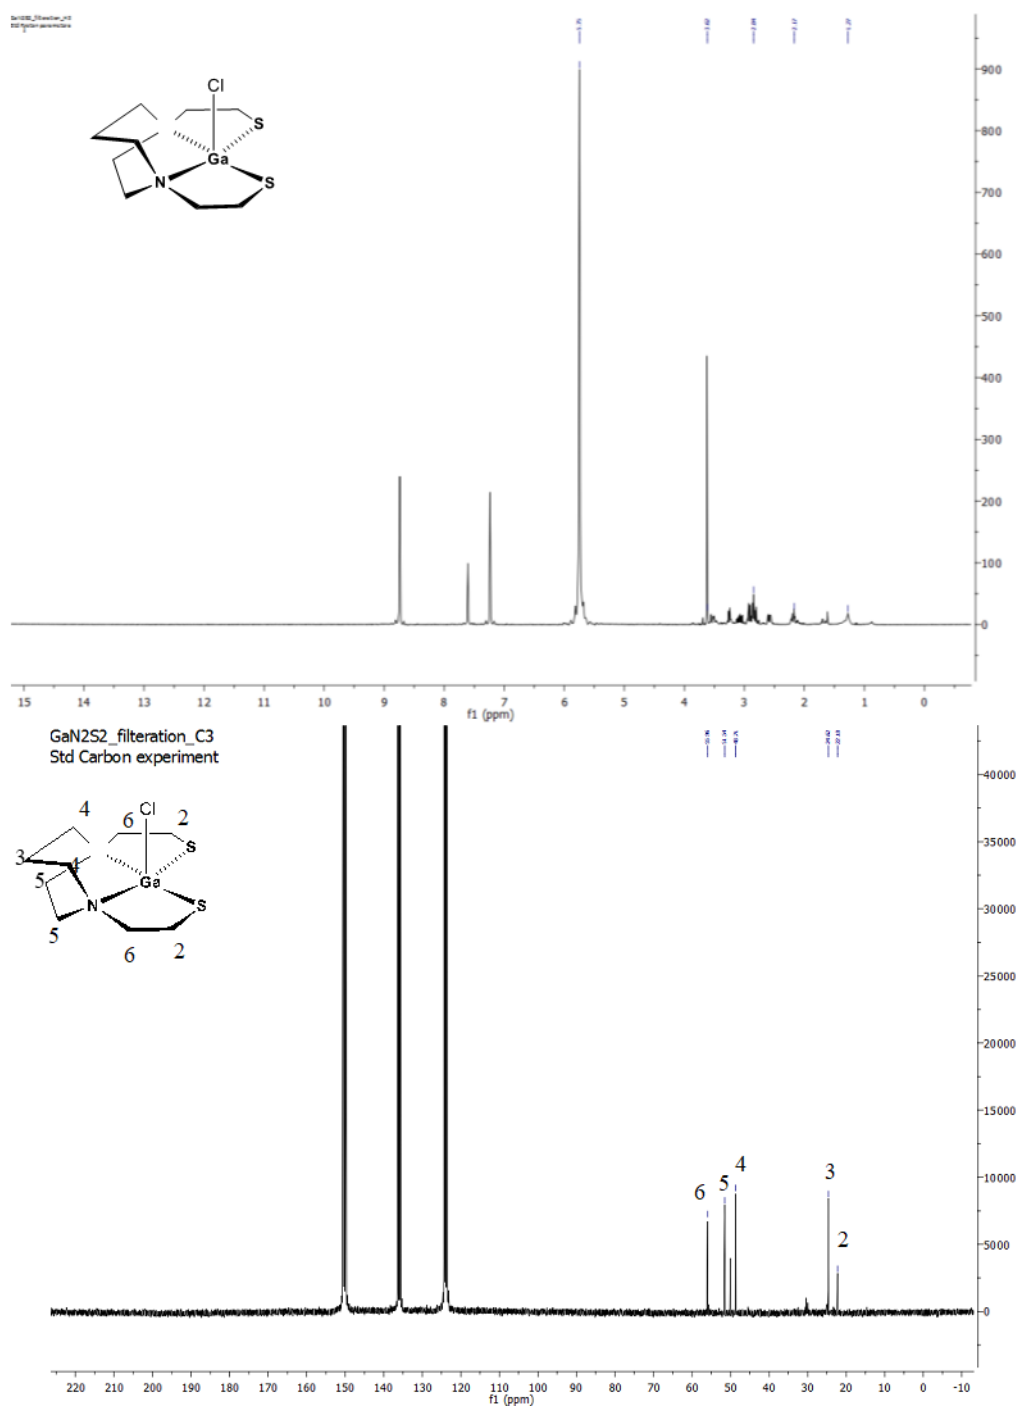

**Figure S2.** <sup>1</sup>H-NMR (up) and <sup>13</sup>C-NMR Spectrum of ClGaN<sub>2</sub>S<sub>2</sub> complex in pyridine-d<sub>5</sub> at 23.2 °C using a 300 MHz NMR spectrometer referenced to residual pyridine.

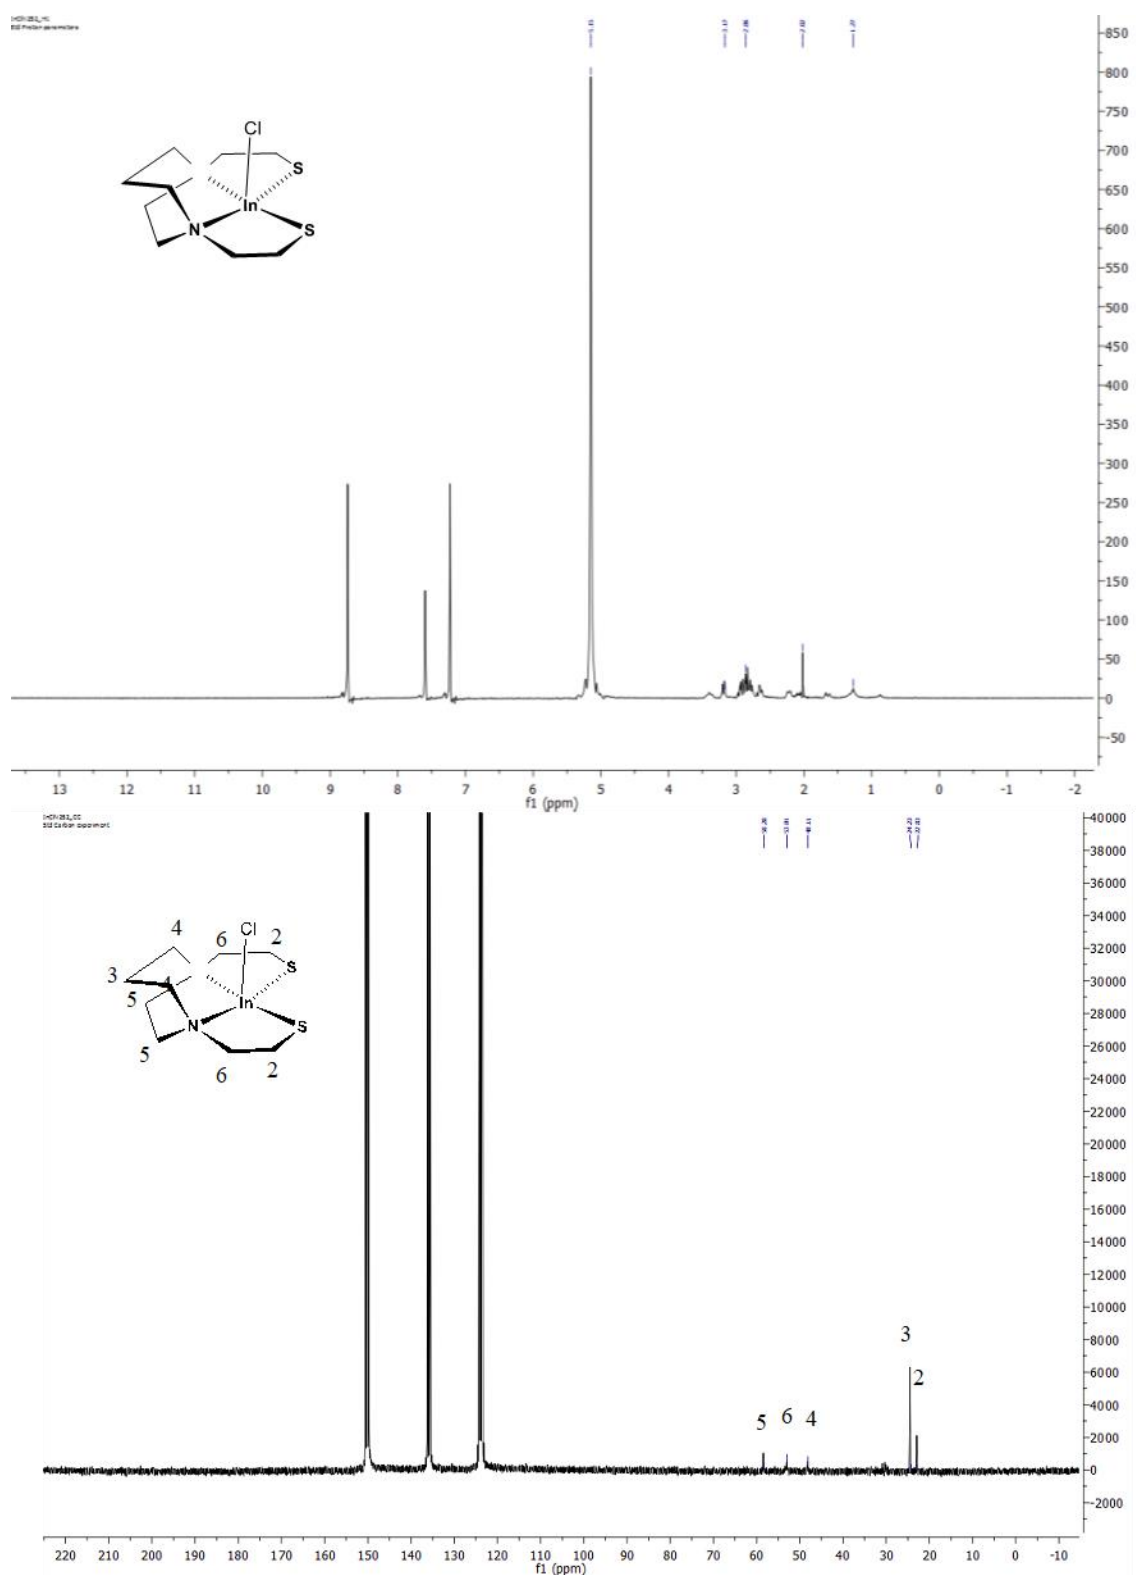

**Figure S3.**  $^1\text{H}$ -NMR (up) and  $^{13}\text{C}$ -NMR Spectrum of  $\text{ClInN}_2\text{S}_2$  complex in pyridine- $\text{d}_5$  at  $23.2^\circ\text{C}$  using a 300 MHz NMR spectrometer referenced to residual pyridine.

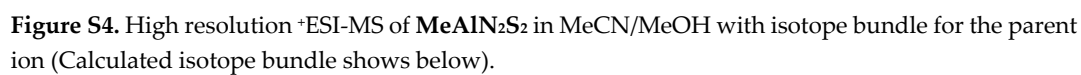

08161908a #121-155 RT: 0.54-0.69 AV: 35 SB: 28 0.27-0.39 NL: 5  
T: FTMS + p ESI Full ms [50.0000-750.0000]

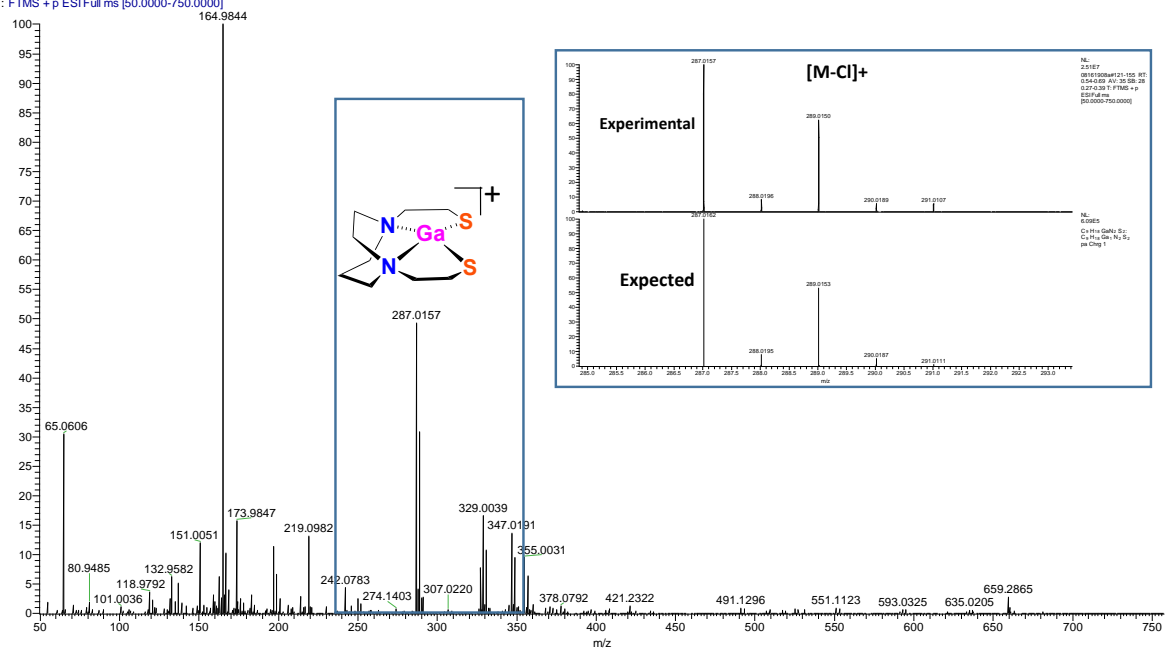

**Figure S5.** High resolution  $^+$ ESI-MS of  $\text{ClGaIn}_2\text{S}_2$  in MeCN/MeOH with isotope bundle for the parent ion (Experimental and expected isotope bundle shows in box).

08161909 #115-135 RT: 0.51-0.60 AV: 21 SB: 31 0.22-0.36 NL: 4.6  
T: FTMS + p ESI Full ms [50.0000-750.0000]

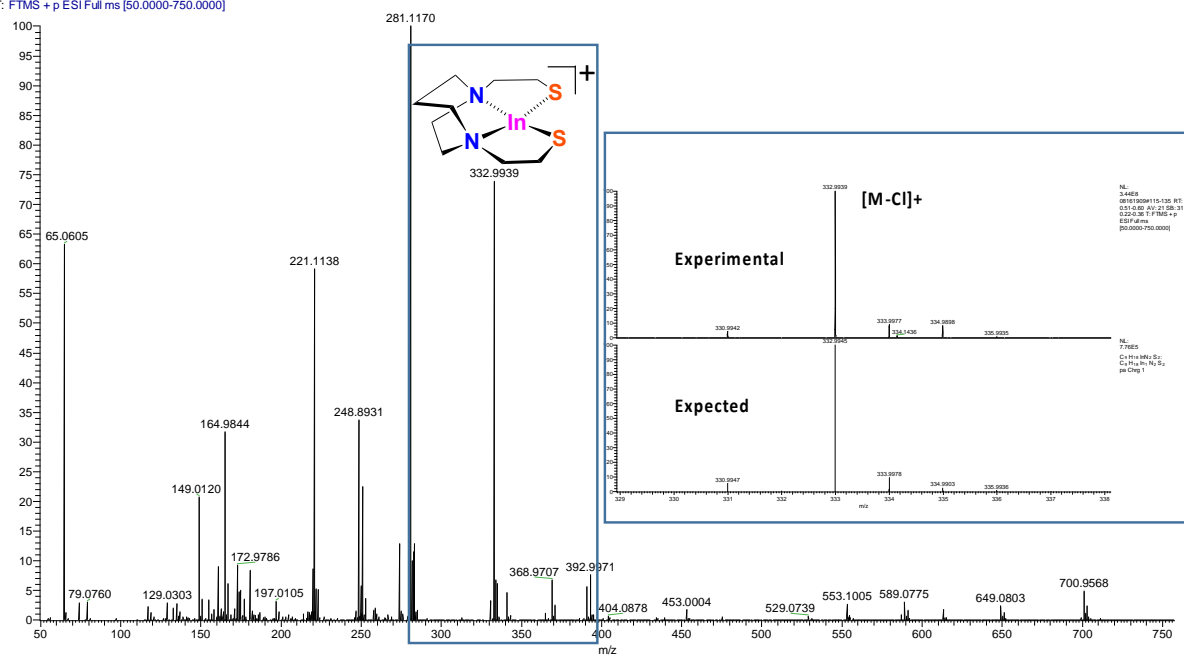

**Figure S6.** High resolution  $^+$ ESI-MS of  $\text{ClInN}_2\text{S}_2$  in MeCN/MeOH with isotope bundle for the parent ion (Experimental and expected isotope bundle shows in box).

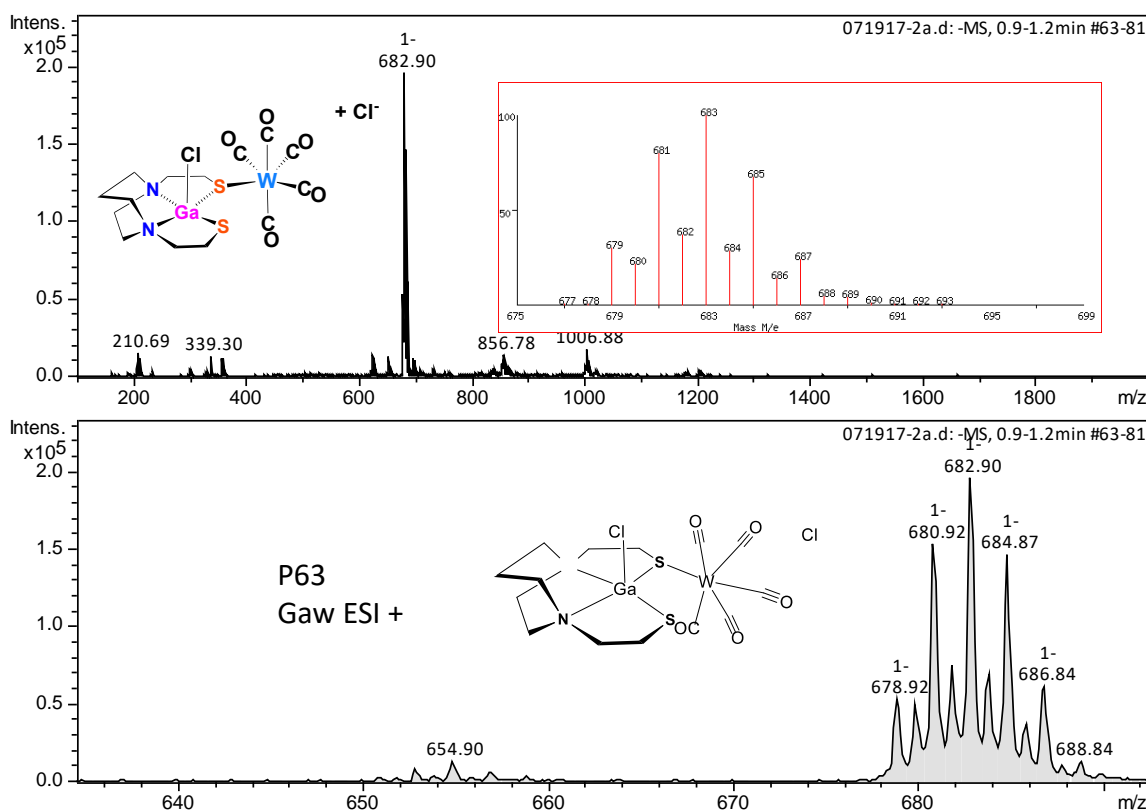

**Figure S7.** Low Resolution of  $^+\text{ESI-MS}$  of  $\text{ClGaW(CO)}_5$  in THF with isotope bundle for the parent ion (Calculated isotope bundle shows in red bracket).

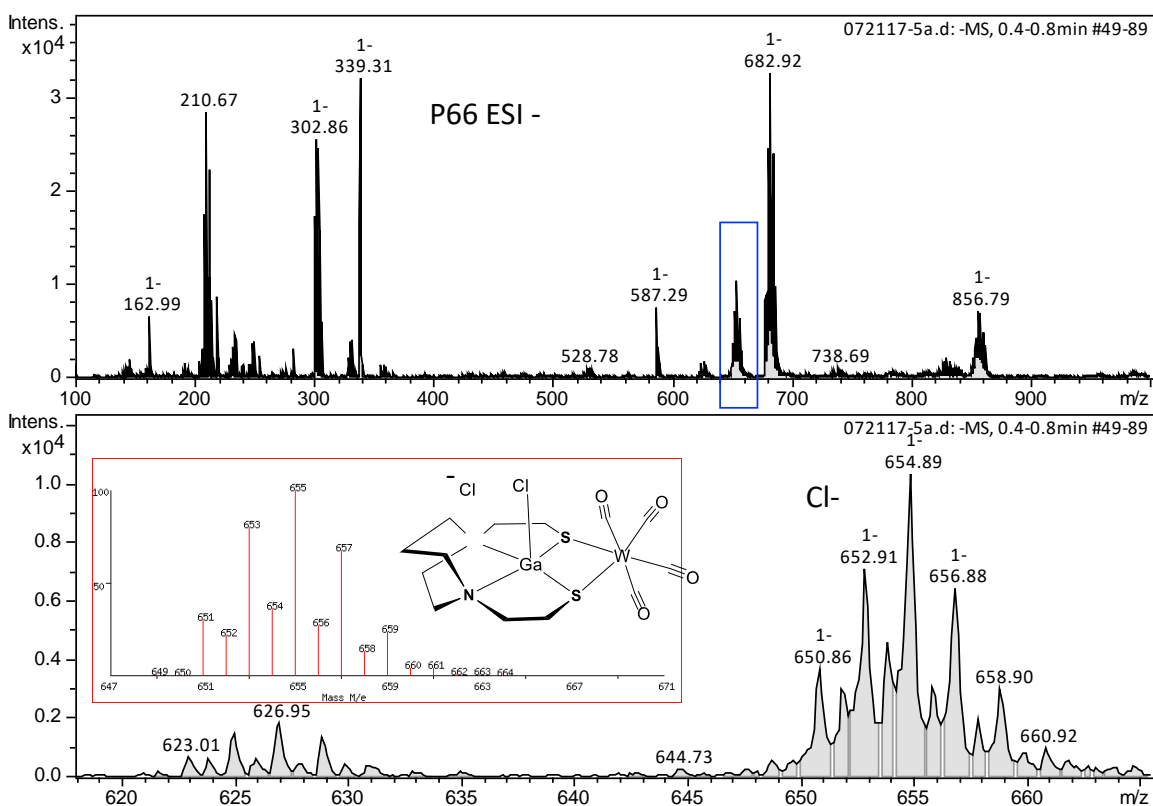

**Figure S8.** Low Resolution of  $^+\text{ESI-MS}$  of  $\text{ClGaW(CO)}_4$  in THF with isotope bundle for the parent ion (Calculated isotope bundle shows in red bracket).

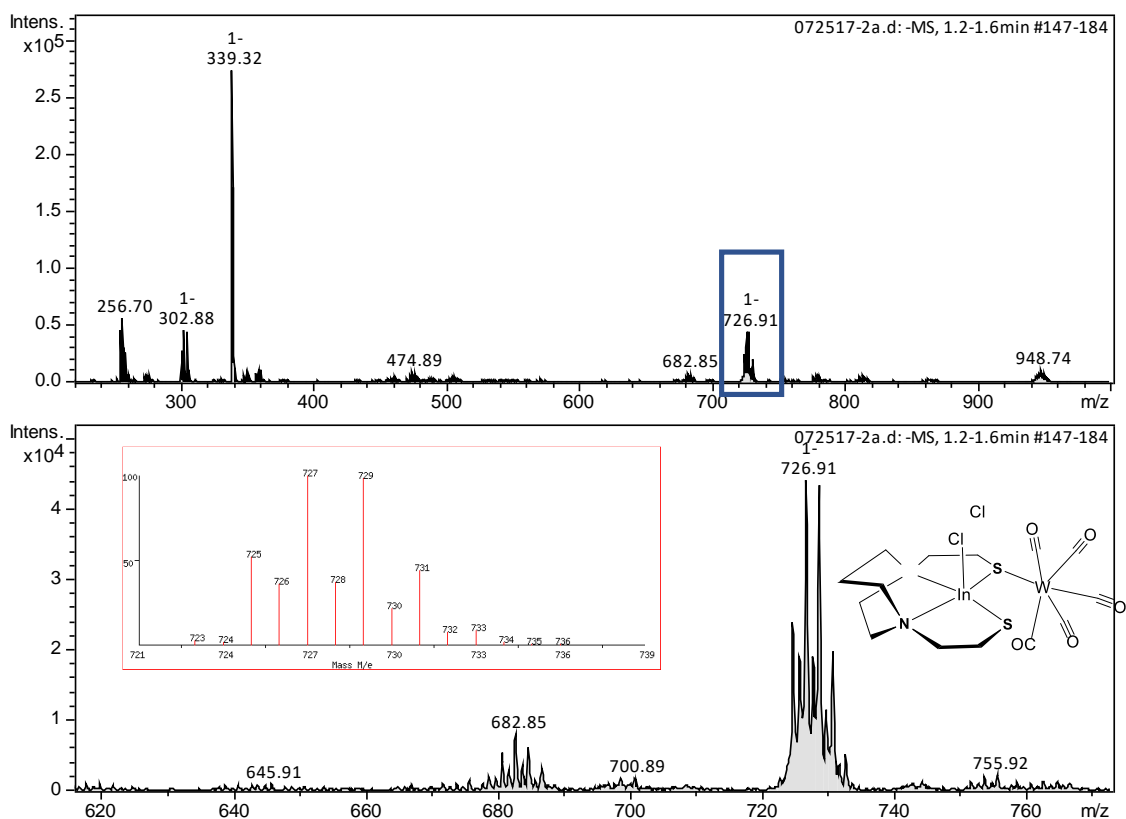

**Figure S9.** Low Resolution of  $^+ESI\text{-}MS$  of  $ClInW(CO)_5$  in THF with isotope bundle for the parent ion (Calculated isotope bundle shows in red bracket).

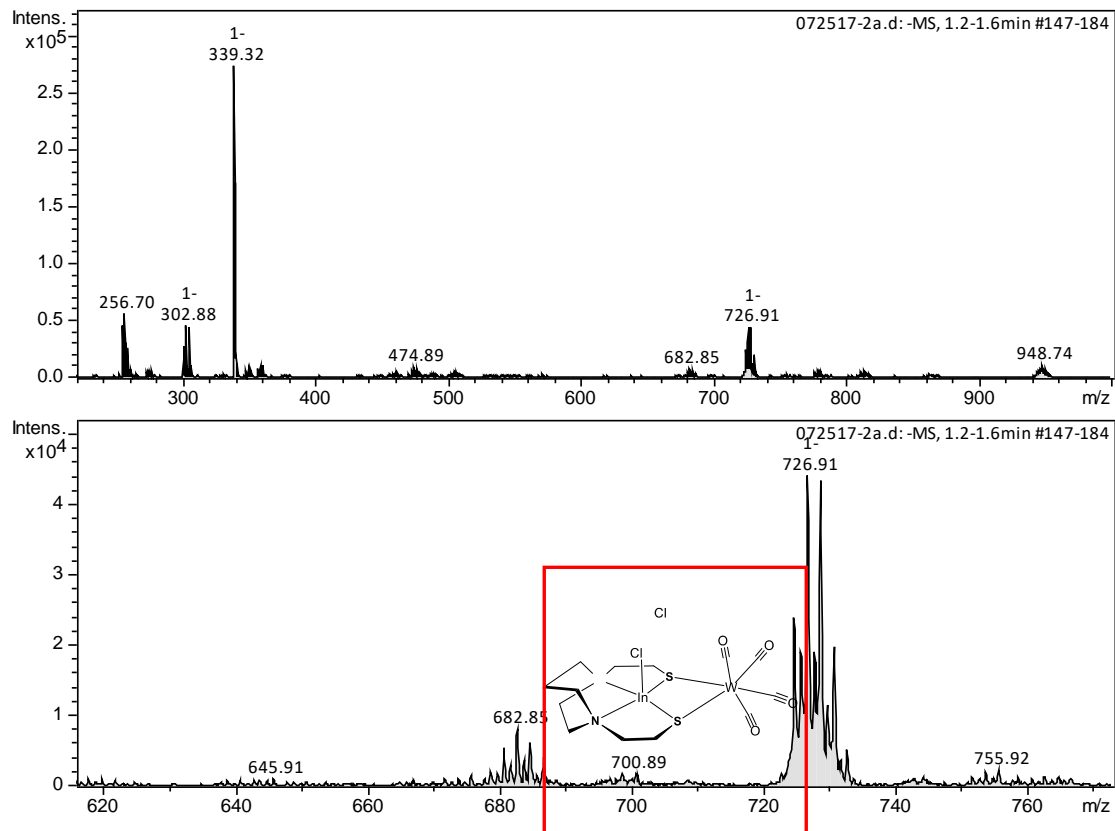

**Figure S10.** Low Resolution of  $^+ESI\text{-}MS$  of  $ClInW(CO)_4$  in THF with isotope bundle for the parent ion.

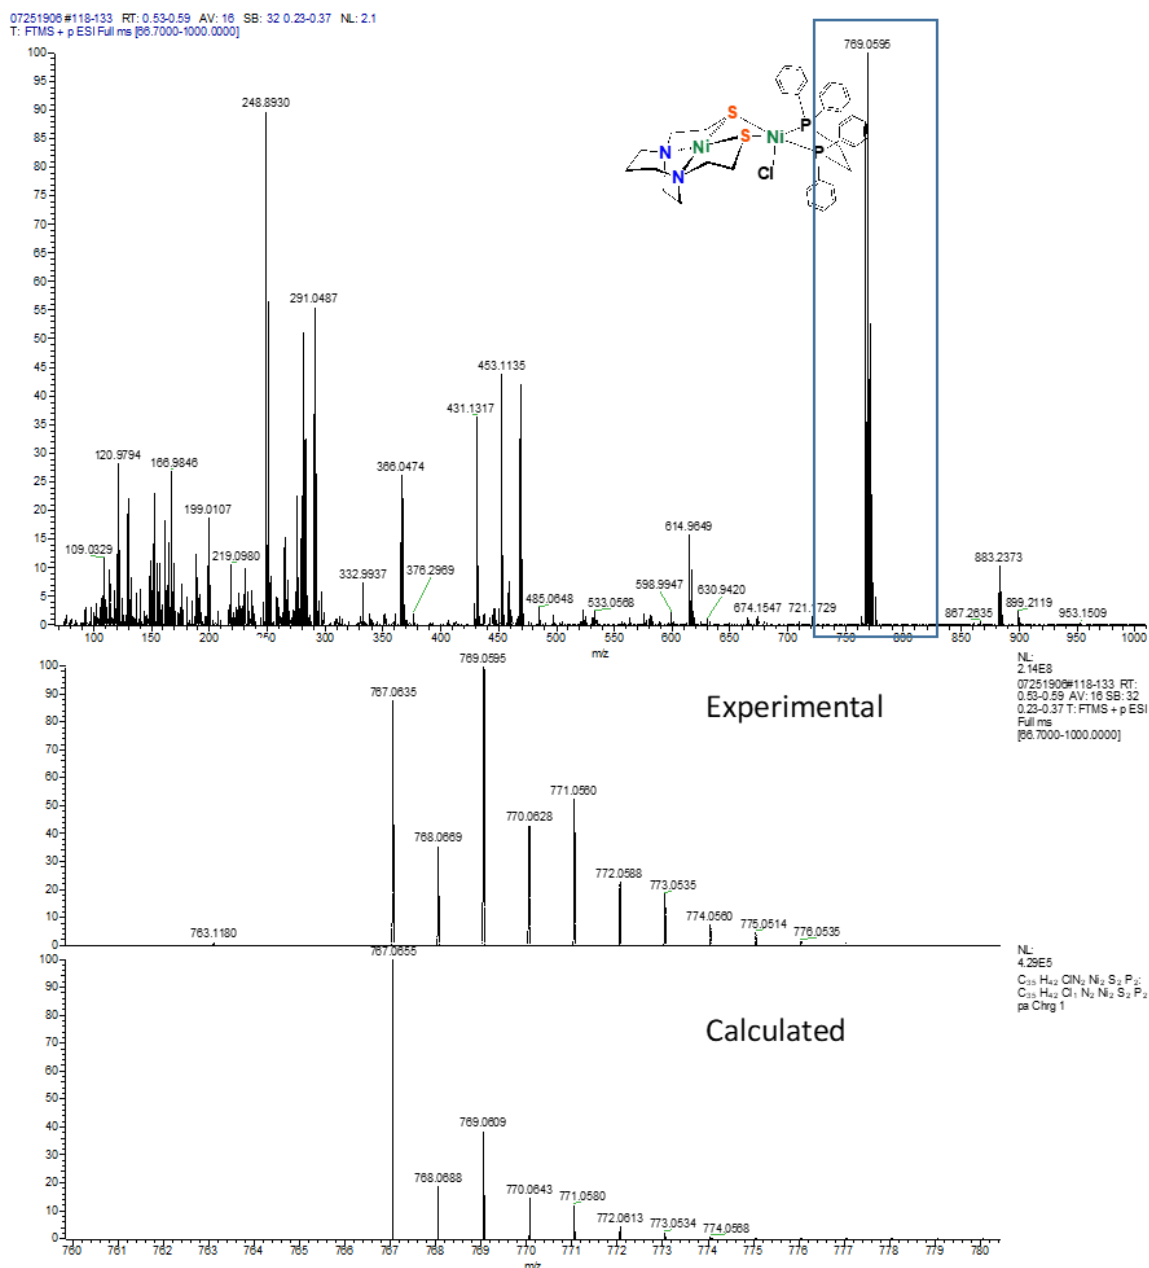

**Figure S11.** High Resolution of <sup>+</sup>ESI-MS of the products from the reaction of **InClN<sub>2</sub>S<sub>2</sub>** with **NidppeCl<sub>2</sub>** in MeOH with isotope bundle for the parent ion (Experimental and calculated isotope bundle shows below).



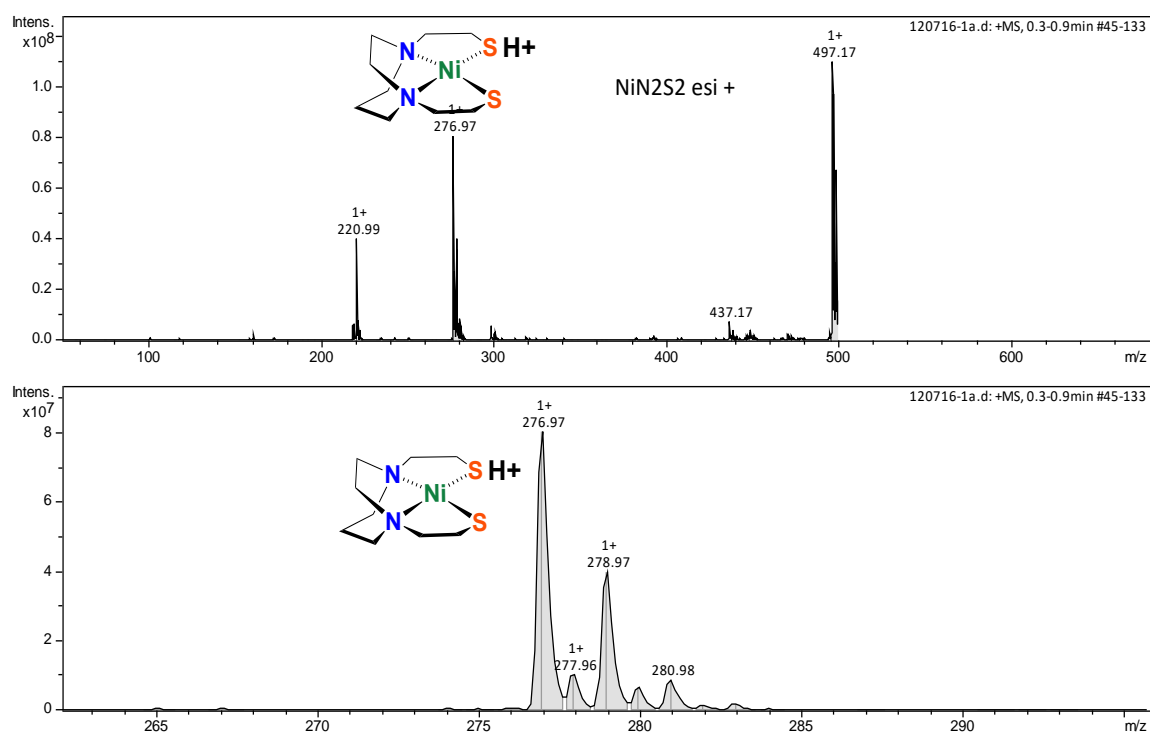

**Figure S12.** Low resolution of  $^+$ ESI-MS of the products from the reaction of  $\text{AlMeN}_2\text{S}_2$  with  $\text{Ni}(\text{BF}_4)_2$  in MeOH with isotope bundle for the parent ion.

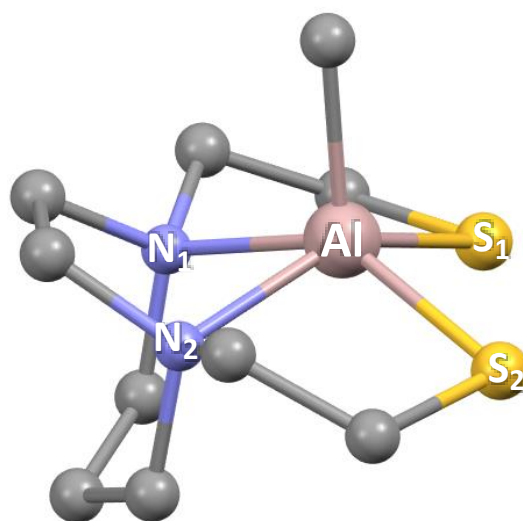

**Figure S13.** Crystal structure of **MeAlN<sub>2</sub>S<sub>2</sub>**.

**Table S1.** Data and structure refinement for **MeAlN<sub>2</sub>S<sub>2</sub>**.

| Identification Code                                          | mo AlMe 0m                                                                   |
|--------------------------------------------------------------|------------------------------------------------------------------------------|
| Empirical formula                                            | C <sub>10</sub> H <sub>21</sub> N <sub>2</sub> AlS <sub>2</sub>              |
| Formula weight                                               | 260.39                                                                       |
| Temperature/K                                                | 100.15                                                                       |
| Crystal system                                               | triclinic                                                                    |
| Space group                                                  | P-1                                                                          |
| <i>a</i> /Å                                                  | 7.354(4)                                                                     |
| <i>b</i> /Å                                                  | 7.723(4)                                                                     |
| <i>c</i> /Å                                                  | 12.601(6)                                                                    |
| $\alpha$ /°                                                  | 94.767(7)                                                                    |
| $\beta$ /°                                                   | 98.204(7)                                                                    |
| $\gamma$ /°                                                  | 115.566(6)                                                                   |
| Volume/Å <sup>3</sup>                                        | 630.6(5)                                                                     |
| <i>Z</i>                                                     | 2                                                                            |
| $\rho_{\text{calc}}/\text{cm}^3$                             | 1.371                                                                        |
| $\mu/\text{mm}^{-1}$                                         | 0.463                                                                        |
| <i>F</i> (000)                                               | 280.0                                                                        |
| Crystal size/mm <sup>3</sup>                                 | 0.05 × 0.02 × 0.02                                                           |
| Radiation                                                    | MoK $\alpha$ ( $\lambda$ = 0.71073)                                          |
| 2 $\theta$ range for data collection/°                       | 3.31 to 50.99                                                                |
| Index ranges                                                 | −8 ≤ <i>h</i> ≤ 8, −9 ≤ <i>k</i> ≤ 9, −15 ≤ <i>l</i> ≤ 15                    |
| Reflections collected                                        | 6296                                                                         |
| Independent reflections                                      | 2333 [ <i>R</i> <sub>int</sub> = 0.0971, <i>R</i> <sub>sigma</sub> = 0.1270] |
| Data/restraints/parameters                                   | 2333/0/138                                                                   |
| Goodness-of-fit on <i>F</i> <sup>2</sup>                     | 1.250                                                                        |
| Final <i>R</i> indexes [ <i>I</i> ≥ 2 $\sigma$ ( <i>I</i> )] | <i>R</i> <sub>1</sub> = 0.0733, <i>wR</i> <sub>2</sub> = 0.1248              |
| Final <i>R</i> indexes [all data]                            | <i>R</i> <sub>1</sub> = 0.1185, <i>wR</i> <sub>2</sub> = 0.1386              |
| Largest diff. peak/hole / e Å <sup>−3</sup>                  | 0.63/−0.44                                                                   |

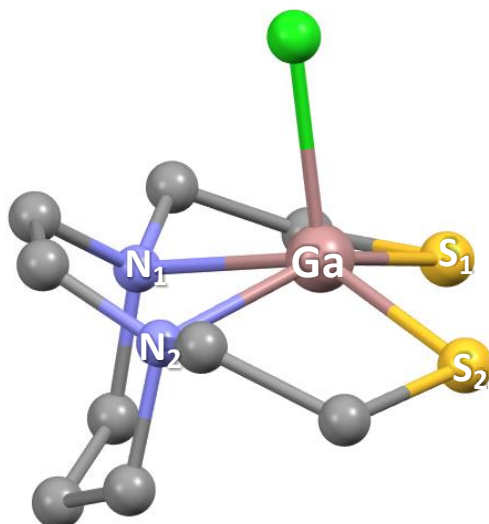

**Figure S14.** Crystal structure of  $\text{ClGaN}_2\text{S}_2$ .

**Table S2.** Crystal data and structure refinement for  $\text{ClGaN}_2\text{S}_2$ .

| Identification Code                           | cu 062517                                                     |
|-----------------------------------------------|---------------------------------------------------------------|
| Empirical formula                             | $\text{C}_9\text{H}_{18}\text{ClGaN}_2\text{S}_2$             |
| Formula weight                                | 323.54                                                        |
| Temperature/K                                 | 100.0                                                         |
| Crystal system                                | triclinic                                                     |
| Space group                                   | P-1                                                           |
| $a/\text{\AA}$                                | 7.3341(5)                                                     |
| $b/\text{\AA}$                                | 7.6637(5)                                                     |
| $c/\text{\AA}$                                | 12.6658(9)                                                    |
| $\alpha/^\circ$                               | 94.557(2)                                                     |
| $\beta/^\circ$                                | 98.228(2)                                                     |
| $\gamma/^\circ$                               | 114.796(2)                                                    |
| Volume/ $\text{\AA}^3$                        | 631.86(8)                                                     |
| Z                                             | 2                                                             |
| $\rho_{\text{calc}}/\text{g cm}^{-3}$         | 1.701                                                         |
| $\mu/\text{mm}^{-1}$                          | 7.767                                                         |
| F(000)                                        | 332.0                                                         |
| Crystal size/ $\text{mm}^3$                   | $0.1 \times 0.01 \times 0.01$                                 |
| Radiation                                     | $\text{CuK}\alpha$ ( $\lambda = 1.54178$ )                    |
| $2\theta$ range for data collection/ $^\circ$ | 7.138 to 122.514                                              |
| Index ranges                                  | $-8 \leq h \leq 8, -8 \leq k \leq 8, -14 \leq l \leq 14$      |
| Reflections collected                         | 11060                                                         |
| Independent reflections                       | 1862 [ $R_{\text{int}} = 0.0270, R_{\text{sigma}} = 0.0232$ ] |
| Data/restraints/parameters                    | 1862/0/136                                                    |
| Goodness-of-fit on $F^2$                      | 1.040                                                         |
| Final R indexes [ $I \geq 2\sigma(I)$ ]       | $R_1 = 0.0498, wR_2 = 0.1389$                                 |
| Final R indexes [all data]                    | $R_1 = 0.0500, wR_2 = 0.1392$                                 |
| Largest diff. peak/hole / $\text{e \AA}^{-3}$ | 1.42/−0.51                                                    |

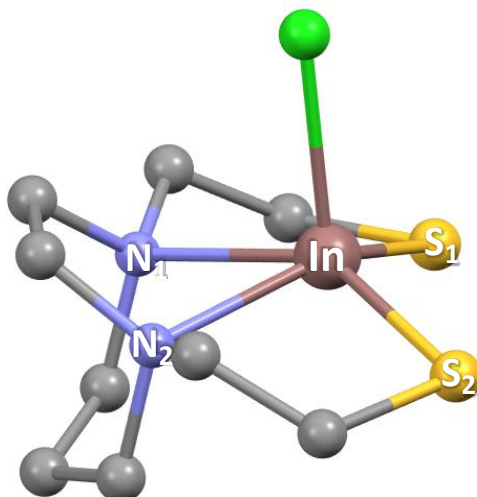Figure S15. Crystal structure of **ClInN<sub>2</sub>S<sub>2</sub>**.Table S3. Crystal data and structure refinement for **ClInN<sub>2</sub>S<sub>2</sub>**.

| Identification Code                                          | ALET 0m-auto                                                                 |
|--------------------------------------------------------------|------------------------------------------------------------------------------|
| Empirical formula                                            | C <sub>9</sub> H <sub>18</sub> ClInN <sub>2</sub> S <sub>2</sub>             |
| Formula weight                                               | 368.66                                                                       |
| Temperature/K                                                | 143.19                                                                       |
| Crystal system                                               | monoclinic                                                                   |
| Space group                                                  | P2 <sub>1</sub> /c                                                           |
| <i>a</i> /Å                                                  | 12.7424(6)                                                                   |
| <i>b</i> /Å                                                  | 7.3373(3)                                                                    |
| <i>c</i> /Å                                                  | 15.3561(7)                                                                   |
| $\alpha$ /°                                                  | 90                                                                           |
| $\beta$ /°                                                   | 114.107(1)                                                                   |
| $\gamma$ /°                                                  | 90                                                                           |
| Volume/Å <sup>3</sup>                                        | 1310.5(1)                                                                    |
| <i>Z</i>                                                     | 4                                                                            |
| $\rho_{\text{calc}}/\text{cm}^3$                             | 1.8684                                                                       |
| $\mu/\text{mm}^{-1}$                                         | 19.029                                                                       |
| <i>F</i> (000)                                               | 742.1                                                                        |
| Crystal size/mm <sup>3</sup>                                 | 0.1 × 0.1 × 0.2                                                              |
| Radiation                                                    | Cu K $\alpha$ ( $\lambda$ = 1.54178)                                         |
| 2 $\theta$ range for data collection/°                       | 7.6 to 144.84                                                                |
| Index ranges                                                 | −15 ≤ <i>h</i> ≤ 15, −9 ≤ <i>k</i> ≤ 9, −18 ≤ <i>l</i> ≤ 18                  |
| Reflections collected                                        | 18017                                                                        |
| Independent reflections                                      | 2567 [ <i>R</i> <sub>int</sub> = 0.0540, <i>R</i> <sub>sigma</sub> = 0.0333] |
| Data/restraints/parameters                                   | 2567/0/135                                                                   |
| Goodness-of-fit on <i>F</i> <sup>2</sup>                     | 1.000                                                                        |
| Final <i>R</i> indexes [ <i>I</i> ≥ 2 $\sigma$ ( <i>I</i> )] | <i>R</i> <sub>1</sub> = 0.0305, <i>wR</i> <sub>2</sub> = 0.0840              |
| Final <i>R</i> indexes [all data]                            | <i>R</i> <sub>1</sub> = 0.0307, <i>wR</i> <sub>2</sub> = 0.0844              |
| Largest diff. peak/hole / e Å <sup>−3</sup>                  | 0.72/−1.88                                                                   |

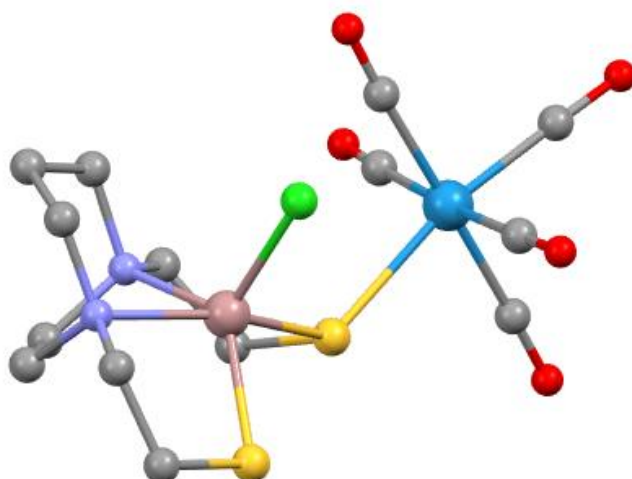

**Figure S16.** Crystal structure of  $\text{ClGaW(CO)}_5$ .

**Table S4.** Crystal data and structure refinement for gawco5.

| Identification Code                           | gawco5                                                         |
|-----------------------------------------------|----------------------------------------------------------------|
| Empirical formula                             | $\text{C}_{14}\text{H}_{18}\text{ClGaW}_2\text{O}_5\text{S}_2$ |
| Formula weight                                | 647.44                                                         |
| Temperature/K                                 | 100                                                            |
| Crystal system                                | monoclinic                                                     |
| Space group                                   | $P2_1/n$                                                       |
| $a/\text{\AA}$                                | 8.2266(11)                                                     |
| $b/\text{\AA}$                                | 19.245(2)                                                      |
| $c/\text{\AA}$                                | 12.8581(18)                                                    |
| $\alpha/^\circ$                               | 90                                                             |
| $\beta/^\circ$                                | 95.932(8)                                                      |
| $\gamma/^\circ$                               | 90                                                             |
| Volume/ $\text{\AA}^3$                        | 2024.8(5)                                                      |
| Z                                             | 4                                                              |
| $\rho_{\text{calc}}/\text{g cm}^{-3}$         | 2.124                                                          |
| $\mu/\text{mm}^{-1}$                          | 15.370                                                         |
| $F(000)$                                      | 1240.0                                                         |
| Crystal size/ $\text{mm}^3$                   | $0.1 \times 0.01 \times 0.01$                                  |
| Radiation                                     | $\text{CuK}\alpha$ ( $\lambda = 1.54184$ )                     |
| $2\theta$ range for data collection/ $^\circ$ | 8.3 to 122.524                                                 |
| Index ranges                                  | $-9 \leq h \leq 9, -21 \leq k \leq 21, -14 \leq l \leq 14$     |
| Reflections collected                         | 21370                                                          |
| Independent reflections                       | 3117 [ $R_{\text{int}} = 0.0442, R_{\text{sigma}} = 0.0267$ ]  |
| Data/restraints/parameters                    | 3117/0/239                                                     |
| Goodness-of-fit on $F^2$                      | 1.026                                                          |
| Final R indexes [ $I \geq 2\sigma(I)$ ]       | $R_1 = 0.0320, wR_2 = 0.0781$                                  |
| Final R indexes [all data]                    | $R_1 = 0.0344, wR_2 = 0.0800$                                  |
| Largest diff. peak/hole / $e \text{\AA}^{-3}$ | 0.85/−0.52                                                     |

Table S5. The ratio of M–N/M–S in  $\text{XMN}_2\text{S}_2$ .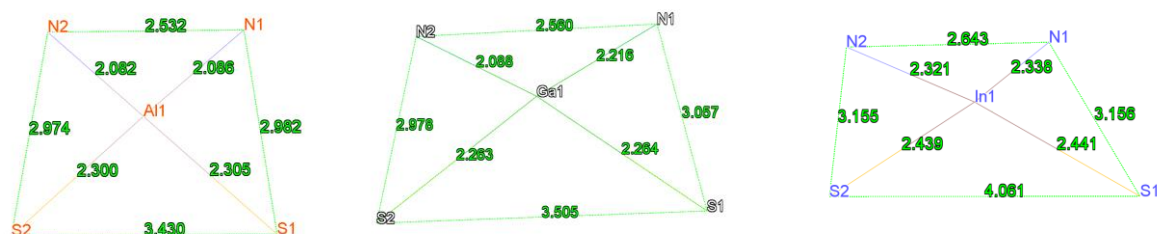

|         | AlN2S2 | GaN2S2 | InN2S2 |
|---------|--------|--------|--------|
| M–N/M–S | 0.905  | 0.950  | 0.955  |

Table S6. The  $\nu(\text{CO})$  values in different  $\text{MW}(\text{CO})_4$  complexes.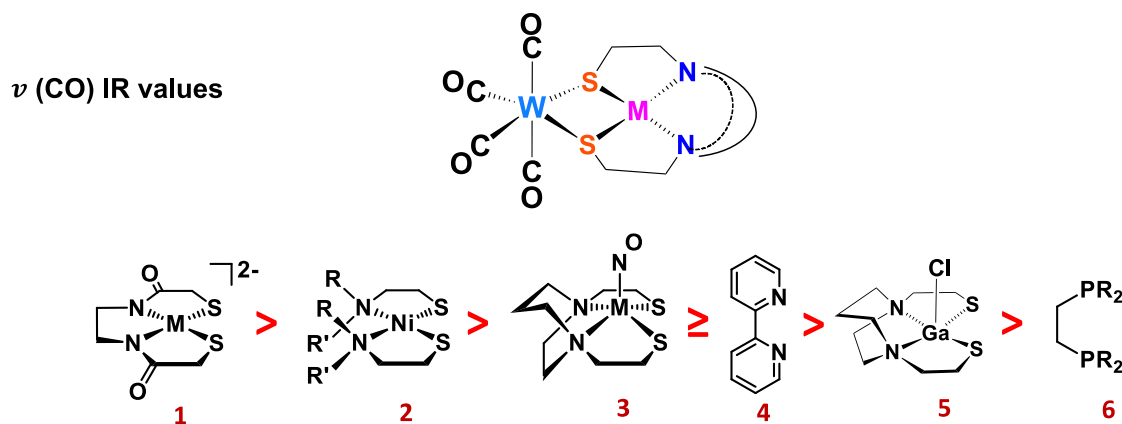

| Compound                                                       | $\nu(\text{A}_1^1)$ | $\nu(\text{B}_1)$ | $\nu(\text{A}_1^2)$ | $\nu(\text{B}_2)$ |
|----------------------------------------------------------------|---------------------|-------------------|---------------------|-------------------|
| 1, $\text{Ni}(\text{ema})\text{W}(\text{CO})_4$                | 1986                | 1853              | 1837                | 1791              |
| 2, $\text{Ni}(\text{bme-Me}_2\text{PDA})\text{W}(\text{CO})_4$ | 1993                | 1876              | 1843                | 1826              |
| 3, $\text{Fe}(\text{NO})\text{W}(\text{CO})_4$                 | 1998                | 1880              | 1854                | 1827              |
| 4, $(\text{bipy})\text{W}(\text{CO})_4$                        | 2006                | 1886              | 1870                | 1830              |
| 5, $\text{GaClW}(\text{CO})_4$                                 | 2007                | 1926              | 1893                | 1849              |
| 6, $(\text{dppe})\text{W}(\text{CO})_4$                        | 2015                | 1900              | 1900                | 1870              |

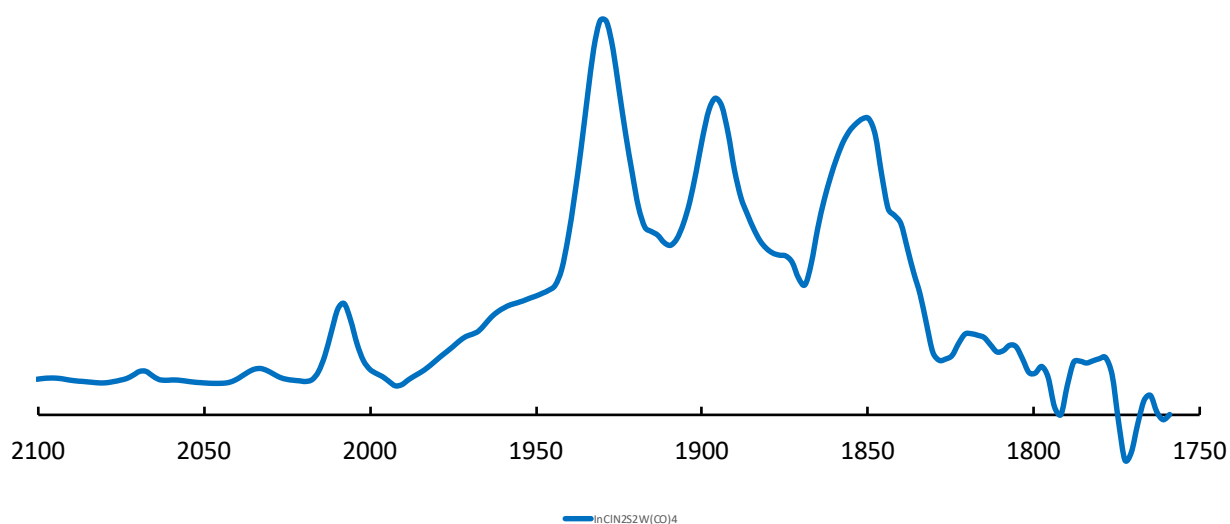

**Figure S17.** The IR spectra of  $\text{ClInW(CO)}_4$  resulting from  $\text{ClInW(CO)}_5$  under UV light.

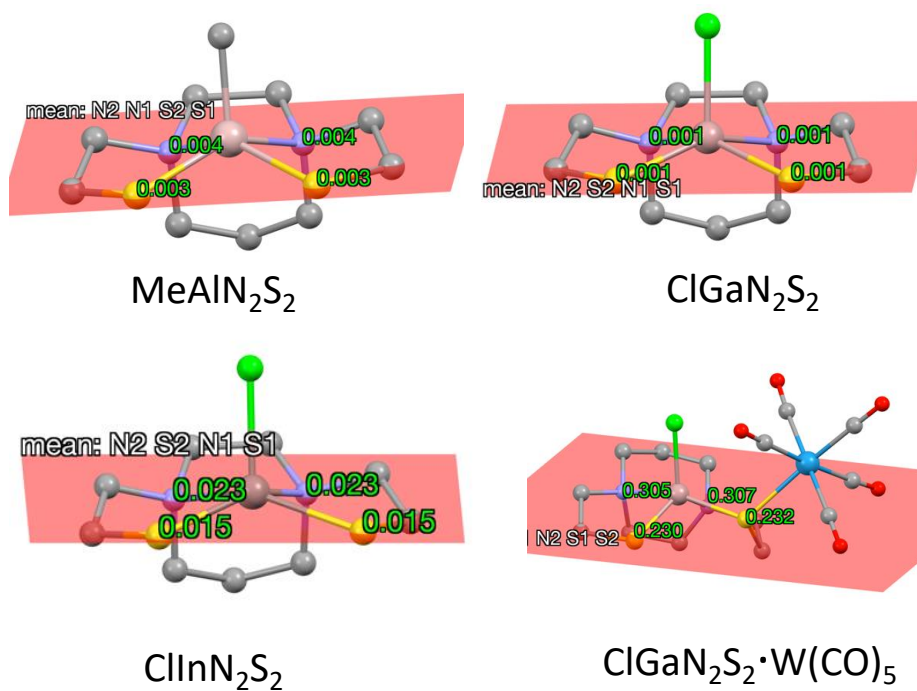

**Figure S18.** The deviations of Nitrogen and Sulfur atoms from N<sub>2</sub>S<sub>2</sub> plane, which is calculated by Mercury Program.
